# Supplementary material
Source: publisher figshare collection journal article supplement (https://diabetesjournals.figshare.com/articles/dataset/_/12899315)
Supplement: Supplementary file 1 [file 1]

**ONLINE APPENDIX – Azoury ME, Tarayrah M et al.**

**Peptides derived from insulin granule proteins are targeted by CD8<sup>+</sup> T cells  
across MHC Class I restrictions in humans and NOD mice.**

| Study phase | Group                                                                                                                    | Case ID | Age (yrs) | Gender (M/F) | T1D duration (wks) | GADA | IA-2A | ZnT8A | Therapy |
|-------------|--------------------------------------------------------------------------------------------------------------------------|---------|-----------|--------------|--------------------|------|-------|-------|---------|
| Screening   | Healthy (n=7)                                                                                                            | H002N   | 44        | M            | NA                 | ND   | ND    | ND    | NA      |
|             |                                                                                                                          | H004N   | 44        | M            | NA                 | ND   | ND    | ND    | NA      |
|             |                                                                                                                          | H156C   | 25        | F            | NA                 | ND   | ND    | ND    | NA      |
|             |                                                                                                                          | H423C   | 25        | F            | NA                 | ND   | ND    | ND    | NA      |
|             |                                                                                                                          | H458C   | 33        | F            | NA                 | ND   | ND    | ND    | NA      |
|             |                                                                                                                          | H459C   | 25        | M            | NA                 | ND   | ND    | ND    | NA      |
|             |                                                                                                                          | H478C   | 32        | F            | NA                 | ND   | ND    | ND    | NA      |
|             | 32                      42.9% M<br>(24-47)              57.1% F                                                          |         |           |              |                    |      |       |       |         |
| Validation  | T1D (n=9)                                                                                                                | D286T   | 38        | F            | 0.3                | +    | +     | +     | insulin |
|             |                                                                                                                          | D309V   | 30        | F            | 1.4                | +    | +     | ND    | insulin |
|             |                                                                                                                          | D187D   | 40        | F            | 34.9               | +    | -     | ND    | insulin |
|             |                                                                                                                          | D406D   | 26        | F            | 0.4                | +    | +     | +     | insulin |
|             |                                                                                                                          | D396D   | 25        | F            | 3.4                | +    | -     | +     | insulin |
|             |                                                                                                                          | D204D   | 22        | M            | 2.0                | +    | -     | ND    | insulin |
|             |                                                                                                                          | D275T   | 30        | F            | 6.7                | +    | ND    | ND    | insulin |
|             |                                                                                                                          | D242D   | 23        | M            | 0.1                | +    | -     | ND    | insulin |
|             |                                                                                                                          | D404V   | 27        | M            | 0.3                | +    | -     | ND    | insulin |
|             | 26                      33.4% M                      1.4<br>(22-40)              66.6% F                      (0.3-32.0) |         |           |              |                    |      |       |       |         |
|             | Healthy (n=9)                                                                                                            | H004N   | 44        | M            | NA                 | ND   | ND    | ND    | NA      |
|             |                                                                                                                          | H005N   | 38        | F            | NA                 | ND   | ND    | ND    | NA      |
|             |                                                                                                                          | H112C   | 42        | F            | NA                 | ND   | ND    | ND    | NA      |
|             |                                                                                                                          | H355C   | 32        | M            | NA                 | ND   | ND    | ND    | NA      |
|             |                                                                                                                          | H423C   | 25        | M            | NA                 | ND   | ND    | ND    | NA      |
|             |                                                                                                                          | H449C   | 20        | F            | NA                 | ND   | ND    | ND    | NA      |
|             |                                                                                                                          | H458C   | 33        | M            | NA                 | ND   | ND    | ND    | NA      |
|             |                                                                                                                          | H459C   | 25        | F            | NA                 | ND   | ND    | ND    | NA      |
|             |                                                                                                                          | H478C   | 32        | F            | NA                 | ND   | ND    | ND    | NA      |
|             | 32                      44.5% M<br>(25-44)              55.5% F                                                          |         |           |              |                    |      |       |       |         |

**Table S1. Characteristics of HLA-A3<sup>+</sup> study participants.** The healthy donors analyzed in Fig. 2 (screening phase) and the patients with type 1 diabetes (T1D) and age/sex-matched healthy donors analyzed in Fig. 3 (validation phase) are listed. The distribution of age, gender and T1D duration is shown at the bottom of each list (median and range for numerical variables). GADA, IA-2A, ZnT8A are anti-GAD, -IA-2 and -ZnT8 auto-antibodies, respectively. ND, not determined; NA, not available or not applicable.

| Protein/mRNA          | Peptide                | Sequence           | Type                  | MMr staining pattern | T-cell+ donors | Frequency in CD8+                      | Donors with $\geq 5$ MMr+ cells | % antigen experienced | Validation |
|-----------------------|------------------------|--------------------|-----------------------|----------------------|----------------|----------------------------------------|---------------------------------|-----------------------|------------|
| ABCC8                 | 787-795                | IIFESPFNK          | Conventional          | Spread               | 6/6            | $8.0 \times 10^{-6}$                   | 5/6                             | 14.3                  | No         |
| <b>**C15orf48-003</b> | <b>50-58</b>           | <b>KVSAPAYCK</b>   | <b>mRNA splice</b>    | <b>Clustered</b>     | <b>6/6</b>     | <b><math>1.7 \times 10^{-5}</math></b> | <b>5/6</b>                      | <b>22.7</b>           | <b>Yes</b> |
| C15orf48-003          | 97-106                 | ATGRSQMVRK         | mRNA splice           | Spread               | 5/5            | $4.0 \times 10^{-6}$                   | 0/5                             | NA                    | No         |
| <b>*C15orf48-003</b>  | <b>103-111</b>         | <b>MVRKGMNLK</b>   | <b>mRNA splice</b>    | <b>Clustered</b>     | <b>5/5</b>     | <b><math>8.3 \times 10^{-6}</math></b> | <b>4/5</b>                      | <b>15.3</b>           | <b>Yes</b> |
| CADPS1;CADPS2         | 780-788                | SLLERVLTK          | Conventional          | Spread               | 5/6            | $4.0 \times 10^{-6}$                   | 2/6                             | NA                    | No         |
| CHGB                  | 603-613                | RVAQLDQLLHY        | Conventional          | NA                   | 3/6            | $8.8 \times 10^{-7}$                   | 0/6                             | NA                    | No         |
| <b>**CTNND1-026</b>   | <b>852-860</b>         | <b>QVSYPMSQK</b>   | <b>mRNA splice</b>    | <b>Clustered</b>     | <b>5/5</b>     | <b><math>3.4 \times 10^{-5}</math></b> | <b>5/5</b>                      | <b>10.3</b>           | <b>Yes</b> |
| G6PC2-001             | 317-326                | HLFYVLSFCK         | mRNA splice           | ND                   | 1/6            | 0                                      | 1/6                             | NA                    | No         |
| G6PC2-001             | 343-351                | HMLMKQSGK          | mRNA splice           | Spread               | 3/5            | $3.1 \times 10^{-6}$                   | 1/5                             | NA                    | No         |
| GNAS-036              | 22-31                  | KVKKVPLAEK         | mRNA splice           | Spread               | 3/5            | $1.4 \times 10^{-6}$                   | 1/5                             | NA                    | No         |
| GNAS-036              | 33-42                  | RQMRKEALEK         | mRNA splice           | Clustered            | 4/5            | $1.7 \times 10^{-6}$                   | 1/5                             | NA                    | No         |
| <b>**GNAS-036</b>     | <b>74-83</b>           | <b>LLLGAGESGK</b>  | <b>mRNA splice</b>    | <b>Clustered</b>     | <b>6/6</b>     | <b><math>2.2 \times 10^{-5}</math></b> | <b>5/6</b>                      | <b>8.7</b>            | <b>Yes</b> |
| GNAS-050              | 16-24                  | RSSTRHSGK          | mRNA splice           | ND                   | 1/5            | 0                                      | 0/5                             | NA                    | No         |
| <b>**GNAS-050</b>     | <b>159-168</b>         | <b>RLCHLSLMEK</b>  | <b>mRNA splice</b>    | <b>Clustered</b>     | <b>5/5</b>     | <b><math>6.2 \times 10^{-6}</math></b> | <b>4/5</b>                      | <b>10.0</b>           | <b>Yes</b> |
| <b>**GNAS-050</b>     | <b>477-485</b>         | <b>RLLRGLLAR</b>   | <b>mRNA splice</b>    | <b>Clustered</b>     | <b>5/6</b>     | <b><math>1.2 \times 10^{-5}</math></b> | <b>5/6</b>                      | <b>5.6</b>            | <b>Yes</b> |
| GNAS-050              | 496-504                | AAAACCTMK          | mRNA splice           | Spread               | 4/6            | $1.3 \times 10^{-6}$                   | 0/6                             | NA                    | No         |
| <b>*GNAS-050</b>      | <b>542-551</b>         | <b>ATYSATFSCK</b>  | <b>mRNA splice</b>    | <b>Clustered</b>     | <b>4/5</b>     | <b><math>2.2 \times 10^{-6}</math></b> | <b>2/5</b>                      | <b>NA</b>             | <b>Yes</b> |
| INS/PTPRN             | 15-21/893-896          | ALWGPDP/KVVK       | Peptide splice        | Spread               | 6/6            | $1.2 \times 10^{-5}$                   | 1/6                             | NA                    | No         |
| KCNK16                | 13-21                  | RVLPLLLAY          | Conventional          | Spread               | 6/6            | $4.4 \times 10^{-6}$                   | 2/6                             | NA                    | No         |
| KIF1A                 | 153-161                | RVRDLLNPK          | Conventional          | Spread               | 4/6            | $2.9 \times 10^{-6}$                   | 1/6                             | NA                    | No         |
| KIF1A                 | 219-228                | AVFNIFTQK          | Conventional          | Spread               | 5/6            | $4.6 \times 10^{-6}$                   | 1/6                             | NA                    | No         |
| <b>**KIF1A</b>        | <b>860-868</b>         | <b>LLYPVPLVH</b>   | <b>Conventional</b>   | <b>Clustered</b>     | <b>5/6</b>     | <b><math>9.9 \times 10^{-6}</math></b> | <b>3/6</b>                      | <b>85.2</b>           | <b>Yes</b> |
| <b>*LARP4-006</b>     | <b>222-230</b>         | <b>KAINTFFAK</b>   | <b>mRNA splice</b>    | <b>Clustered</b>     | <b>4/6</b>     | <b><math>1.0 \times 10^{-6}</math></b> | <b>2/6</b>                      | <b>NA</b>             | <b>Yes</b> |
| MAP3K13-012           | 33-41                  | AMGNHPSPK          | mRNA splice           | Spread               | 5/6            | $1.9 \times 10^{-6}$                   | 1/6                             | NA                    | No         |
| <b>*MNX1-001</b>      | <b>217-225</b>         | <b>STAGMILPK</b>   | <b>mRNA splice</b>    | <b>Clustered</b>     | <b>6/6</b>     | <b><math>5.9 \times 10^{-6}</math></b> | <b>2/6</b>                      | <b>NA</b>             | <b>Yes</b> |
| ONECUT1-003           | 5-14                   | KSFIKHAKGK         | mRNA splice           | Spread               | 5/6            | $1.4 \times 10^{-6}$                   | 1/6                             | NA                    | No         |
| <b>*ONECUT1-003</b>   | <b>47-56</b>           | <b>KISVHPKNCK</b>  | <b>mRNA splice</b>    | <b>Clustered</b>     | <b>4/6</b>     | <b><math>1.7 \times 10^{-6}</math></b> | <b>2/6</b>                      | <b>NA</b>             | <b>Yes</b> |
| PCSK1                 | 706-714                | KLNKPSQLK          | Conventional          | NA                   | 4/6            | $2.6 \times 10^{-6}$                   | 0/6                             | NA                    | No         |
| PDIA2-007             | 86-94                  | AVHGFPTLK          | mRNA splice           | Spread               | 6/6            | $1.2 \times 10^{-5}$                   | 5/6                             | 30.0                  | No         |
| <b>*PFN2-008</b>      | <b>59-67</b>           | <b>RVLVFMGK</b>    | <b>mRNA splice</b>    | <b>Clustered</b>     | <b>4/6</b>     | <b><math>2.2 \times 10^{-6}</math></b> | <b>3/6</b>                      | <b>14.3</b>           | <b>Yes</b> |
| <b>**PNMA2</b>        | <b>50-58</b>           | <b>RLLGKIFRK</b>   | <b>Conventional</b>   | <b>Clustered</b>     | <b>6/6</b>     | <b><math>1.4 \times 10^{-5}</math></b> | <b>6/6</b>                      | <b>42.5</b>           | <b>Yes</b> |
| PRKACB-008            | 2-10                   | GLLKEFLAK          | mRNA splice           | Spread               | 4/6            | $2.0 \times 10^{-6}$                   | 1/6                             | NA                    | No         |
| PTPRN                 | 156-164                | RLPQPPVGK          | Conventional          | Spread               | 4/6            | $2.4 \times 10^{-5}$                   | 2/6                             | NA                    | No         |
| PTPRN                 | 965-975                | AVAEVNAILK         | Conventional          | Spread               | 3/6            | $2.6 \times 10^{-6}$                   | 2/6                             | NA                    | No         |
| <b>**PTPRN/PTPRN</b>  | <b>576-580/708-711</b> | <b>SVLLT/RLAK</b>  | <b>Peptide splice</b> | <b>Clustered</b>     | <b>6/6</b>     | <b><math>5.3 \times 10^{-6}</math></b> | <b>5/6</b>                      | <b>33.3</b>           | <b>Yes</b> |
| REXO2-020             | 2-11                   | SVANALWIVK         | mRNA splice           | Spread               | 6/6            | $3.9 \times 10^{-6}$                   | 3/6                             | 33.3                  | No         |
| <b>**RTN1</b>         | <b>120-129</b>         | <b>STYFTGILQK</b>  | <b>Conventional</b>   | <b>Clustered</b>     | <b>6/6</b>     | <b><math>7.4 \times 10^{-6}</math></b> | <b>5/6</b>                      | <b>11.1</b>           | <b>Yes</b> |
| <b>**SCG3</b>         | <b>166-174</b>         | <b>AVFDKIVSK</b>   | <b>Conventional</b>   | <b>Clustered</b>     | <b>6/6</b>     | <b><math>3.2 \times 10^{-6}</math></b> | <b>2/6</b>                      | <b>NA</b>             | <b>Yes</b> |
| <b>**SCG5-009</b>     | <b>193-201</b>         | <b>RLKPSLVGK</b>   | <b>mRNA splice</b>    | <b>Clustered</b>     | <b>6/6</b>     | <b><math>7.1 \times 10^{-6}</math></b> | <b>4/6</b>                      | <b>30</b>             | <b>Yes</b> |
| SLC30A8               | 6-16                   | RTYLVNDKAAK        | Conventional          | Clustered            | 5/6            | $1.4 \times 10^{-6}$                   | 0/6                             | NA                    | No         |
| <b>**UCN3</b>         | <b>46-56</b>           | <b>GQWEDASLLSK</b> | <b>Conventional</b>   | <b>Clustered</b>     | <b>5/6</b>     | <b><math>4.9 \times 10^{-6}</math></b> | <b>3/6</b>                      | <b>14.3</b>           | <b>Yes</b> |
| <b>*ZNF268-015</b>    | <b>86-95</b>           | <b>ILKAGKSKAK</b>  | <b>mRNA splice</b>    | <b>Clustered</b>     | <b>4/6</b>     | <b><math>1.8 \times 10^{-6}</math></b> | <b>1/6</b>                      | <b>NA</b>             | <b>Yes</b> |

**Table S2. Summary of islet peptides tested for recognition by circulating naïve CD8<sup>+</sup> T cells in healthy subjects.** The peptides presented in Fig. 2 are alphabetically listed and classified according to type (conventional, mRNA spliced, spliced peptide). The other columns detail the MMr staining pattern (clustered, spread, not detected [ND], or not available [NA] when too few MMr<sup>+</sup> cells were counted), the number of T-cell<sup>+</sup> donors ( $\geq 5/10^7$  MMr<sup>+</sup> cells counted), the median MMr<sup>+</sup> frequency, the number of donors with  $\geq 5$  MMr<sup>+</sup> cells, the median percent antigen-experienced cells within the MMr<sup>+</sup> fraction (for peptides with  $\geq 3$  donors displaying  $\geq 5$  MMr<sup>+</sup> cells), and the final validation outcome. The 19 validated islet peptides displaying the expected frequency out of total CD8<sup>+</sup> T cells ( $\geq 1 \times 10^{-6}$ ; with  $\geq 5$  MMr<sup>+</sup> cells counted for at least one donor) and a clustered MMr staining pattern are marked with one asterisk (or two asterisks for the 12 peptides further analyzed) and highlighted in bold.

| Protein                                                                                     | Peptide               | Sequence                | Predicted Kd affinity SYFPEITHI | Predicted Kd affinity NetMHC |
|---------------------------------------------------------------------------------------------|-----------------------|-------------------------|---------------------------------|------------------------------|
| <b>Urocortin-3 (Ucn3, UniProt Q924A4)</b>                                                   | <b>5-13</b>           | <b>TYFLLPLLL</b>        | <b>23</b>                       | <b>1405</b>                  |
|                                                                                             | <b>32-40</b>          | <b>VFSCLN TAL</b>       | <b>21</b>                       | <b>1177</b>                  |
| <b>Proconvertase-2 (Pcsk2, UniProt P21661)</b>                                              | 109-118               | GYRDINEIDI              | 20                              | 10594                        |
|                                                                                             | <b>341-350</b>        | <b>LYDESCSSTL</b>       | <b>21</b>                       | <b>428</b>                   |
|                                                                                             | <b>501-510</b>        | <b>RYLEHVQAVI</b>       | <b>24</b>                       | <b>1660</b>                  |
| <b>Secretogranin-5 (Scg5, UniProt P12961)</b>                                               | 4-13                  | RLVSAMLSGL              | 14                              | 19542                        |
|                                                                                             | 8-17                  | AMLSGLLFWL              | 13                              | 26446                        |
|                                                                                             | 26-35                 | AYSRTPDRV               | 18                              | 7158                         |
|                                                                                             | <b>193-201</b>        | <b>DNVVAK KSV</b>       | <b>18</b>                       | <b>9660</b>                  |
| <b>Insulin gene enhancer protein-1 1 (Isl1, UniProt P61372)</b>                             | 27-36                 | QYILRVSPDL              | 21                              | 2487                         |
|                                                                                             | 65-74                 | TYCKRDYIRL              | 22                              | 10474                        |
|                                                                                             | 286-294               | SYQPPWKVL               | 30                              | 172                          |
| <b><i>Tumor antigen P198 (Tum)</i></b>                                                      | <b><i>148-156</i></b> | <b><i>KYQAVTTTL</i></b> | <b><i>30</i></b>                | <b><i>6</i></b>              |
| <b><i>Insulin (Ins1/Ins2)</i></b>                                                           | <b><i>B15-23</i></b>  | <b><i>LYLVCGERG</i></b> | <b><i>17</i></b>                | <b><i>9145</i></b>           |
| <b><i>Islet-specific glucose-6-phosphatase catalytic subunit-related protein (Igrp)</i></b> | <b><i>206-214</i></b> | <b><i>VYLKTNVFL</i></b> | <b><i>24</i></b>                | <b><i>195</i></b>            |

**Table S3. Islet peptides tested for recognition by islet-infiltrating CD8<sup>+</sup> T cells of NOD mice.** The 9-mer and 10-mer peptides from the 4 islet antigens Ucn3, Pcsk2, Scg5 and Isl1 were selected according to their *in silico* predicted H2-K<sup>d</sup> binding affinity (top hits using the SYFPEITHI and NetMHC 4.0 algorithms; [www.syfpeithi.de](http://www.syfpeithi.de) and [www.cbs.dtu.dk/services/NetMHC](http://www.cbs.dtu.dk/services/NetMHC)) and, for secreted proteins (Ucn3, Pcsk2 and Scg5), according to a peptide position close to cleavage sites involved in the intermediate processing of their precursors. Peptides yielding positive IFN- $\gamma$  responses (in terms of both percent IFN- $\gamma$ <sup>+</sup> cells and percent positive mice) are shown in bold. Control peptides are shown in italics.

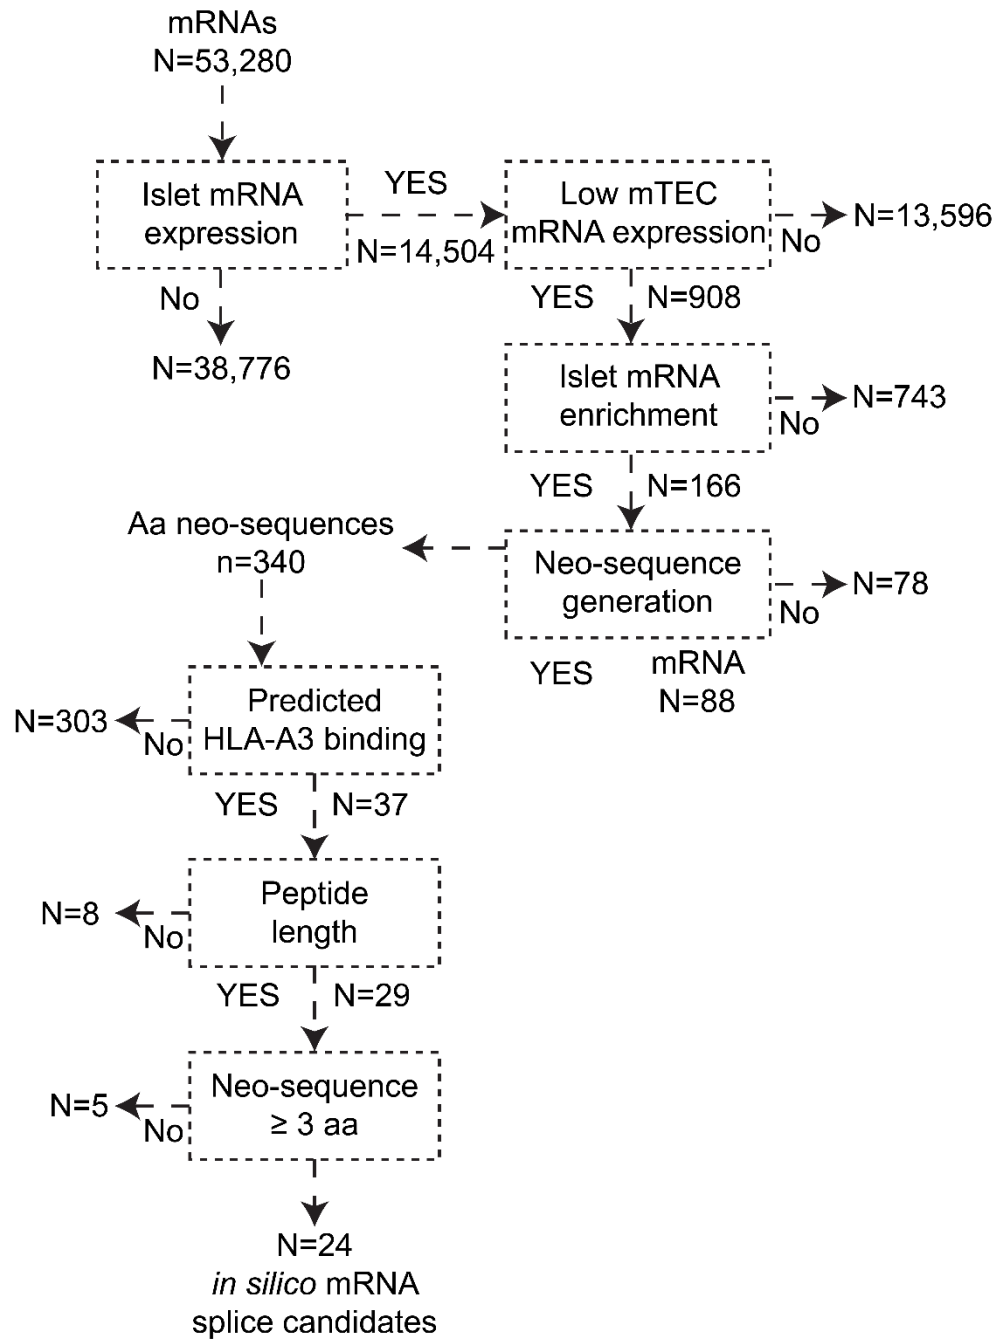

**Figure S1. The bioinformatics pipeline used to identify candidate HLA-A3-restricted epitopes by *in silico* mining of mRNA splice variants.** This analysis strategy was previously described for the identification of HLA-A2-restricted islet epitopes (see *Research Design and Methods*). Briefly, 53,280 mRNAs were filtered based on islet mRNA expression (n=14,504), low mTEC mRNA expression (n=908), islet enrichment compared with control tissues (n=166), and generation of a predicted aa neo-sequence (n=88). The 340 predicted aa neo-sequences obtained from these 88 mRNA variants were scanned for the presence of predicted HLA-A3 binders (n=37) with a 9- to 10-aa length (n=29) and a neo-sequence of  $\geq 3$  aa (n=24).

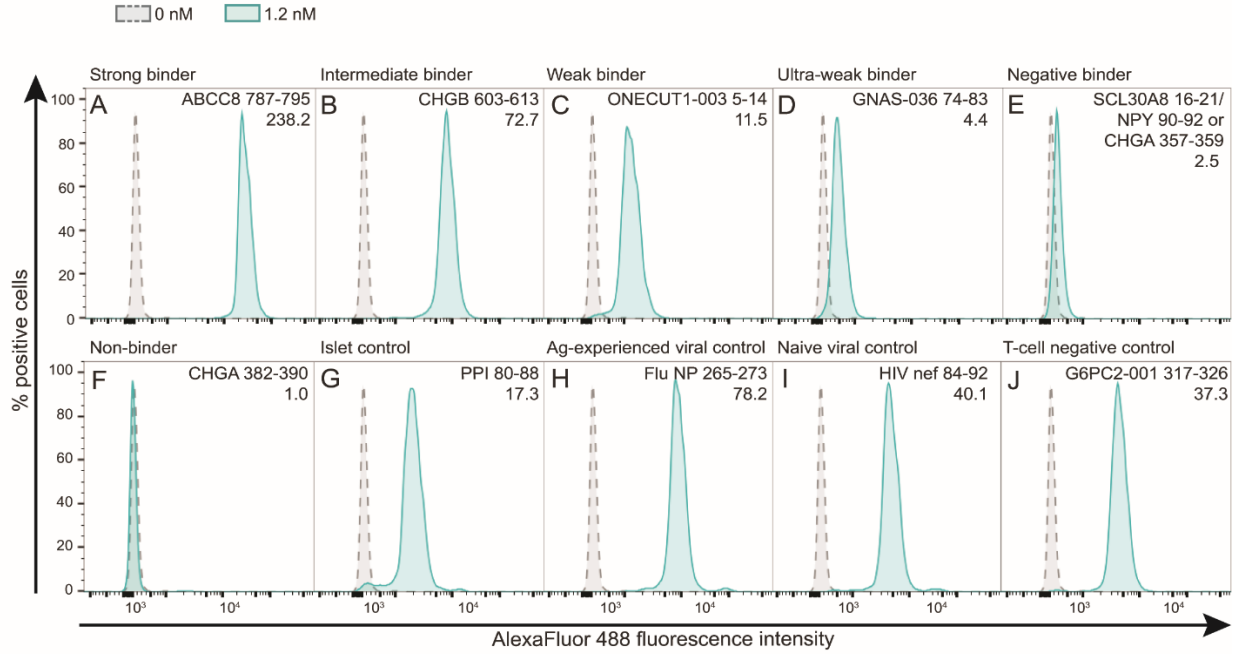

**Figure S2. Representative staining from HLA-A3 binding assays.** Bionylated recombinant monomeric HLA-A3 molecules were folded with the indicated peptides and  $\beta$ 2-microglobulin and captured on streptavidin-coated beads, followed by an anti- $\beta$ 2-microglobulin antibody revealed with an AF488-labeled secondary antibody. A bead-associated fluorescence is only detected if the test peptide supports the folding of the HLA-A3 complex. Peptides were tested at 1.2 nM and examples are shown for strong binders (ABCC8<sub>787-795</sub>; **A**), intermediate binders (ChgB<sub>603-613</sub>; **B**), weak binders (ONECUT1-003<sub>5-14</sub>; **C**), an ultra-weak binder (GNAS-036<sub>74-83</sub>; **D**) and a non-binder (SCL30A8<sub>16-21</sub>/NPY<sub>90-92</sub>; **E**), along with the non-binding (ChgA<sub>382-390</sub>; **F**) and binding control peptides: PPI<sub>80-88</sub> for islet antigens, **G**; Flu NP<sub>265-273</sub> for a recall viral antigen, **H**; HIV nef<sub>84-92</sub> for a naïve viral antigen, **I**; and G6PC2-001<sub>317-326</sub> for the T-cell negative control (i.e. binding peptide but no T-cell recognition, **J**). The empty HLA-A3 complex control (no peptide added) is shown as a dashed grey profile in each histogram. Each peptide was tested in two separate experiments. The indicated values are arbitrary units of median fluorescence intensity normalized to the ChgA<sub>382-390</sub> non-binding control, as those reported in Table 1.

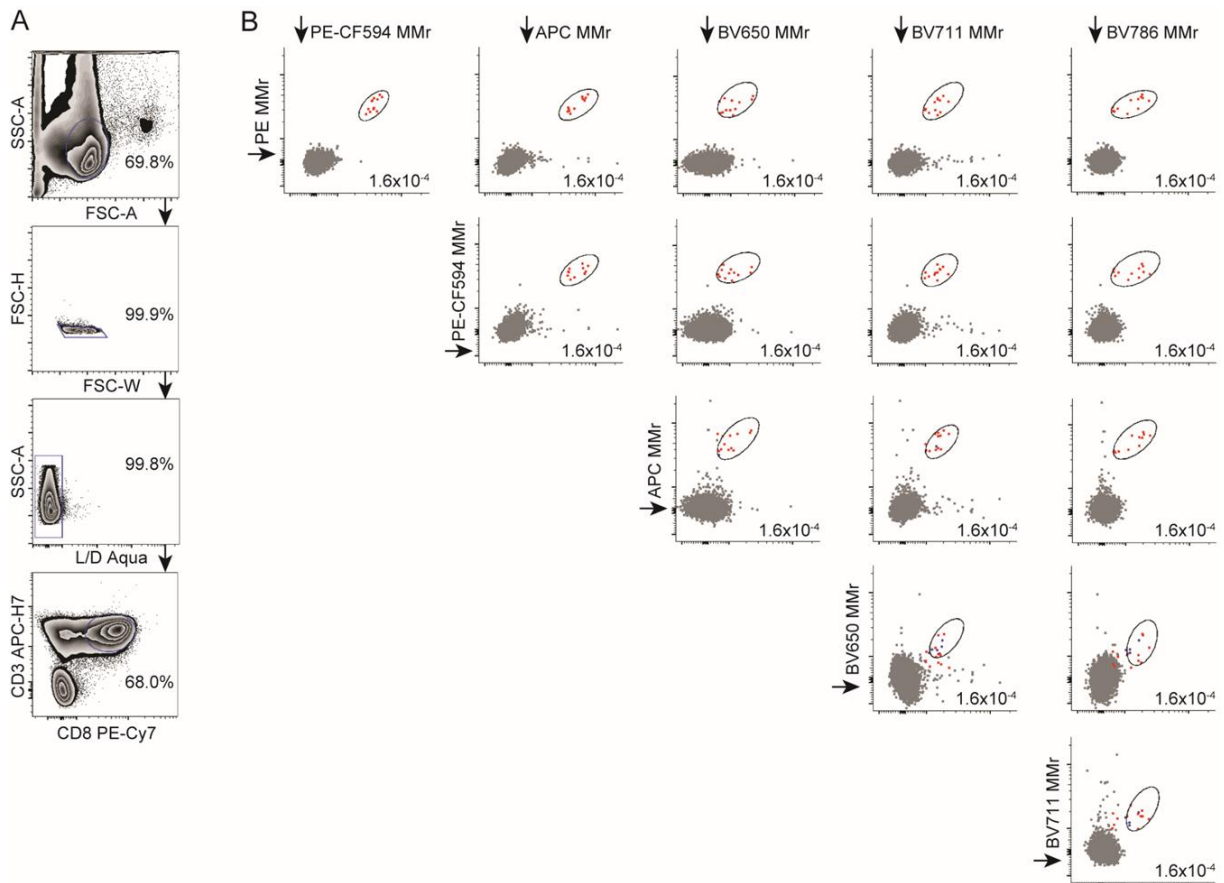

**Figure S3. *Ex-vivo* detection of Flu NP<sub>265-273</sub>-reactive CD8<sup>+</sup> T cells using a 6-color double-stained multimer (MMr) panel.** PBMCs from HLA-A3<sup>+</sup> healthy donor H004N were stained with HLA-A3 MMrs loaded with the Flu NP<sub>265-273</sub> peptide and labeled with 6 fluorochromes (PE, PE-CF594, APC, BV650, BV711, BV786) organized in 15 unique pairs. **(A)** Gates were sequentially set on lymphocytes, single cells, viable cells (Live/Dead Aqua<sup>-</sup>) and CD3<sup>+</sup>CD8<sup>+</sup> cells. **(B)** No combinatorial MMR analysis was applied. Double-stained PE<sup>+</sup>PE-CF594<sup>+</sup> T cells were gated (upper left dot plot) and overlaid (in red) on the other 14 double-stained populations. Numbers in each panel indicate the frequency of gated MMR<sup>+</sup>CD8<sup>+</sup> T-cell out of total CD8<sup>+</sup> T cells. Although identical T-cell frequencies were counted for all fluorochrome pairs, the overlap with PE<sup>+</sup>PE-CF594<sup>+</sup> events was incomplete for the dimmer BV650/BV711, BV650/BV786 and BV711/BV786 pairs (bottom left dot plots). Total CD8<sup>+</sup> events are overlaid in gray in each dot plot.
