# Supplementary material
Source: publisher figshare collection journal article supplement (https://diabetesjournals.figshare.com/articles/dataset/_/12899315)
Supplement: Supplementary file 2 [file 1]

## Checklist for Reporting Human Islet Preparations Used in Research

Adapted from Hart NJ, Powers AC (2018) Progress, challenges, and suggestions for using human islets to understand islet biology and human diabetes. Diabetologia <https://doi.org/10.1007/s00125-018-4772-2>.

|                                                                                                                                                                                                                                                                                                                                                                                  |                                                 |
|----------------------------------------------------------------------------------------------------------------------------------------------------------------------------------------------------------------------------------------------------------------------------------------------------------------------------------------------------------------------------------|-------------------------------------------------|
| <b>Manuscript DOI:</b> <a href="https://doi.org/10.2337/[DB20-0013.R1]">https://doi.org/10.2337/[DB20-0013.R1]</a> (Example, <a href="https://doi.org/10.2337/db18-1234">https://doi.org/10.2337/db18-1234</a> )                                                                                                                                                                 |                                                 |
| <b>Title:</b> Peptides derived from insulin granule proteins are targeted by CD8+ T cells across MHC Class I restrictions in humans and NOD mice.                                                                                                                                                                                                                                |                                                 |
| <b>Author list:</b> Marie Eliane Azoury*, Mahmoud Tarayrah*, Georgia Afonso, Aurore Pais, Maikel L. Colli, Claire Maillard, Cassandra Lavaud, Laure Alexandre-Heymann, Sergio Gonzalez-Duque, Yann Verdier, Joelle Vinh, Sheena Pinto, Soren Buus, Danièle Dubois-Laforgue, Etienne Larger, Jean-Paul Beressi, Graziella Bruno, Decio L. Eizirik, Sylvaine You, Roberto Mallone. |                                                 |
| <b>Corresponding author:</b> Roberto MALLONE                                                                                                                                                                                                                                                                                                                                     | <b>Email address:</b> roberto.mallone@inserm.fr |

| Islet preparation              | 1     | 2     | 3    | 4     | 5     | 6 | 7 | 8 <sup>a</sup> |
|--------------------------------|-------|-------|------|-------|-------|---|---|----------------|
| MANDATORY INFORMATION          |       |       |      |       |       |   |   |                |
| Unique identifier <sup>8</sup> | 19/55 | 19/90 | 20/5 | 20/11 | 20/12 |   |   |                |
| Donor age (years)              | 23    | 31    | 77   | 64    | 58    |   |   |                |
| Donor sex (M/F)                | F     | M     | M    | F     | F     |   |   |                |
| Donor BMI (kg/m <sup>2</sup> ) | 22.5  | 27.8  | 24.5 | 29.4  | 21.3  |   |   |                |

|                                                                                                |                                                  |                                                  |                                                  |                                                  |                                                  |  |  |  |
|------------------------------------------------------------------------------------------------|--------------------------------------------------|--------------------------------------------------|--------------------------------------------------|--------------------------------------------------|--------------------------------------------------|--|--|--|
| Donor HbA <sub>1c</sub> or other measure of blood glucose control (glycemia during ICU, mg/dl) | 110                                              | 146                                              | NA                                               | 159                                              | 215                                              |  |  |  |
| Origin/source of islets <sup>b</sup>                                                           | UNIV. PISA                                       |  |  |  |
| Islet isolation centre                                                                         | Pancreatic Islet Laboratory - University of Pisa |  |  |  |
| Donor history of diabetes? Yes/No                                                              | No                                               | No                                               | No                                               | No                                               | No                                               |  |  |  |
| <b>If Yes, complete the next two lines if this information is available</b>                    |                                                  |                                                  |                                                  |                                                  |                                                  |  |  |  |
| Diabetes duration (years)                                                                      | -                                                | -                                                | -                                                | -                                                | -                                                |  |  |  |
| Glucose-lowering therapy at time of death <sup>c</sup>                                         | -                                                | -                                                | -                                                | -                                                | -                                                |  |  |  |

| RECOMMENDED INFORMATION |                |                     |                     |                     |                     |  |  |  |
|-------------------------|----------------|---------------------|---------------------|---------------------|---------------------|--|--|--|
| Donor cause of death    | Cardiac arrest | Cerebral hemorrhage | Cerebral hemorrhage | Cerebral hemorrhage | Cerebral hemorrhage |  |  |  |
| Warm ischaemia time (h) |                |                     |                     |                     |                     |  |  |  |

|                                     |      |     |      |      |      |  |  |  |
|-------------------------------------|------|-----|------|------|------|--|--|--|
| Cold ischaemia time (h)             | 15   | 16  | 16   | 20   | 14   |  |  |  |
| Estimated purity (%)                | 46   | 66  | 59   | 47   | 67   |  |  |  |
| Estimated viability (%)             | 95.9 | NA  | 94.9 | 92.0 | 94.6 |  |  |  |
| Total culture time (h) <sup>d</sup> | 192  | 192 | 192  | 192  | 192  |  |  |  |
| GSIS – batch incubation             | Yes  | Yes | NA   | Yes  | Yes  |  |  |  |
| Handpicked to purity?<br>Yes/No     | Yes  | Yes | Yes  | Yes  | Yes  |  |  |  |
| Additional notes                    |      |     |      |      |      |  |  |  |

<sup>a</sup>If you have used more than eight islet preparations, please complete additional forms as necessary

<sup>b</sup>For example, IIDP, ECIT, Alberta IsletCore

<sup>c</sup>Please specify the therapy/therapies

<sup>d</sup>Time of islet culture at the isolation centre, during shipment and at the receiving laboratory

<sup>e</sup>Please specify the test and the results
